# Supplementary material for: Cystathionine γ-Lyase Self-Inactivates by Polysulfidation during Cystine Metabolism
Source: MDPI journal article supplement (doi:10.3390/ijms24129982), 2023-06-10

## Supplementary Information

# Cystathionine $\gamma$ -Lyase Self-Inactivates by Polysulfidation during Cystine Metabolism

Shoma Araki <sup>1</sup>, Tsuyoshi Takata <sup>1,2</sup>, Katsuhiko Ono <sup>3</sup>, Tomohiro Sawa <sup>3</sup>, Shingo Kasamatsu <sup>4</sup>, Hideshi Ihara <sup>4</sup>, Yoshito Kumagai <sup>5</sup>, Takaaki Akaike <sup>6</sup>, Yasuo Watanabe <sup>1,\*</sup> and Yukihiro Tsuchiya <sup>1,\*</sup>

<sup>1</sup> Department of Pharmacology, Showa Pharmaceutical University, Machida 194-8543, Japan; araki@ac.shoyaku.ac.jp

<sup>2</sup> South Bend Campus, Indiana University School of Medicine, South Bend, IN 46617, USA; ttakata@nd.edu

<sup>3</sup> Department of Microbiology, Graduate School of Medical Sciences, Kumamoto University, Kumamoto 860-8556, Japan; onokat@kumamoto-u.ac.jp (K.O.); sawat@kumamoto-u.ac.jp (T.S.)

<sup>4</sup> Department of Biological Chemistry, Graduate School of Science, Osaka Metropolitan University, Sakai 599-8531, Japan; kasamatsu@omu.ac.jp (S.K.); iharah@omu.ac.jp (H.I.)

<sup>5</sup> Graduate School of Pharmaceutical Sciences, Kyusyu University, Fukuoka 812-8582, Japan; kumagai.yoshito.864@m.kyushu-u.ac.jp

<sup>6</sup> Department of Environmental Medicine and Molecular Toxicology, Graduate School of Medicine, Tohoku University, Sendai 980-8575, Japan; takaike@med.tohoku.ac.jp

\* Correspondence: yasuwata@ac.shoyaku.ac.jp (Y.W.); yatsuchi@ac.shoyaku.ac.jp (Y.T.); Tel.: +81-42-721-1549 (Y.W.); +81-42-721-1511 (ext.2121) (Y.T.)

## **SUPPLEMENTARY METHODS**

### **Plasmid construction**

The rat CSE mutant C69V, C83V, C108V, C136V, C171V, C205V, C207V, C251V, C254V, C255V, C306V, and C309V was subcloned into pGEX-6P vector. The nucleotide sequence of each mutant was confirmed by DNA sequencing.

## SUPPLEMENTARY FIGURE LEGENDS

**Figure S1.** CSE  $\beta$ -lyase activities of recombinant CSEs. (A) CSE  $\beta$ -lyase activities toward  $\beta$ -CA (3–10 mM) of wild-type and indicated mutants were measured by coupling a color enzymatic reaction with pyruvate oxidase and peroxidase as described in the Materials and Methods section. (B) CSE  $\beta$ -lyase activities toward cystine (0.1–1 mM) examined for the Cys-SSH level with a sulfane sulfur-specific fluorescent probe, SSP4, as described in the Materials and Methods section. The representative data were shown of three-four experiments.

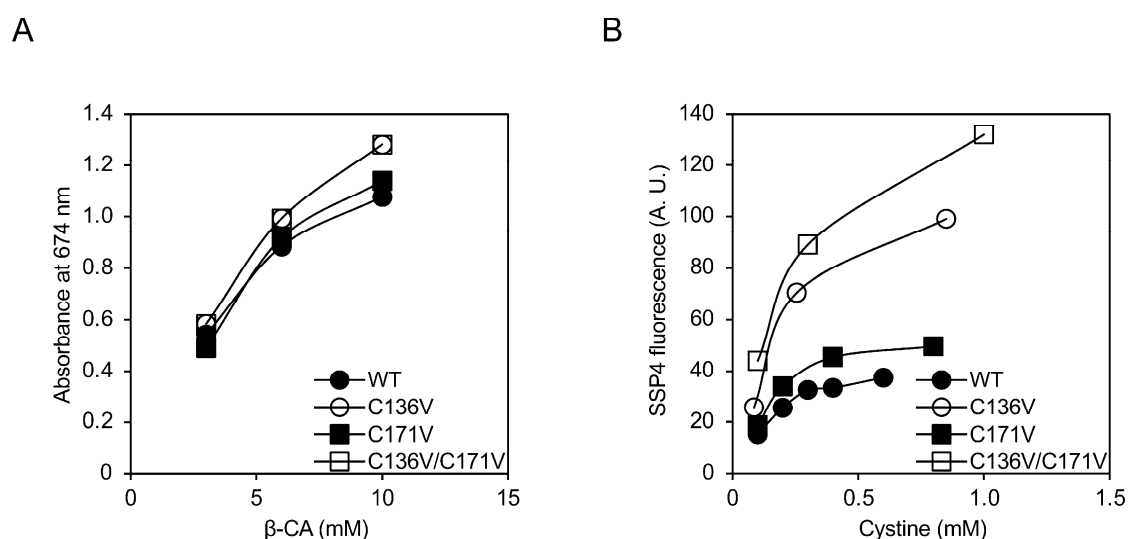

**Figure S2.** The cysteine residue that is sensitive to autoinactivation of CSE  $\beta$ -lyase activity toward cystine to generate Cys-SSH. (A) Purified recombinant CSEs preparation used in this study. Equal amounts (1  $\mu$ g) of GST-cleaved wild-type CSE (WT) and the indicated mutants in *E. coli* cells were separated by 10% SDS-PAGE and stained by Coomassie Brilliant Blue. (B) CSE  $\beta$ -lyase reactions were examined for the Cys-SSH level with a sulfane sulfur-specific fluorescent probe, SSP4, as described in the Materials and Methods section. Values represent the mean  $\pm$  S.E. for four

independent experiments. \*\*\*\*P < 0.0001 and \*\*\*P < 0.001 when compared with wild-type CSE.

A

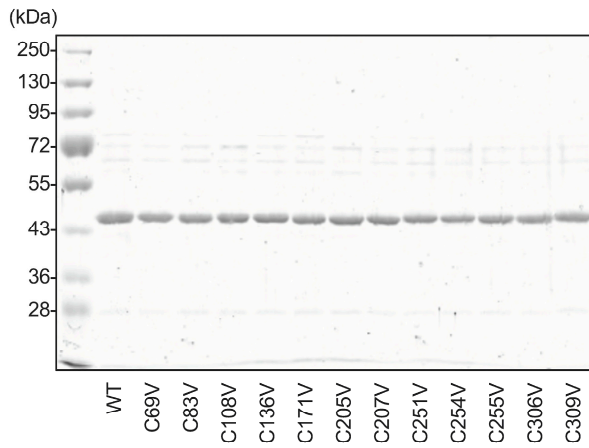

B

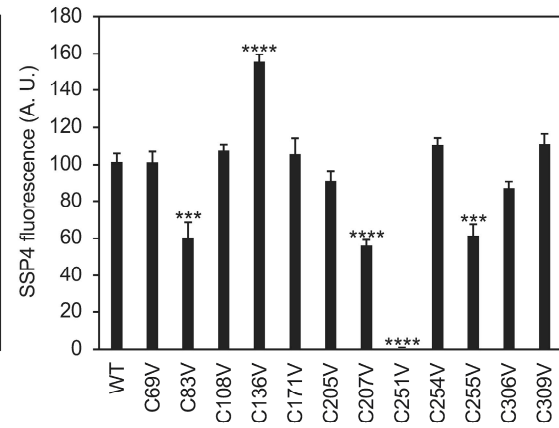

Supplement: s1 [file s1]
